# Supplementary material for: Silica nanoparticles enhanced seed germination and seedling growth of drought-stressed wheat by modulating antioxidant enzymes and mitigating lipid peroxidation
Source: Royal Society of Chemistry journal article supplement (doi:10.1039/d5en00214a), 2025-01-01
Supplement: d5en00214a1.xlsx [file d5en00214a1.xlsx]

## Sheet: Sheet1
The primer sequences for qRT-PCR.
PerimerID	5'-3'	Length
TaActinF	ATGGAAGCTGCTGGAATCCAT	21
TaActinR	CCTTGCTCATACGGTCAGCAATAC	24
TaP5CS	TTTAGAGGCAAATGAGGATTTAATT	25
	TCGCAAGAGTGCGAACAGAT	20
TaSWEETs	GCCGTCGTCTGGTTCCTC	18
	GCGGTCTATCCACCTCCTTT	20
TaAPX	TAGTATTGCCTACAGATGCTGC	22
	GCTTCGGCGTAGTCTTTGA	19
TaPOD	CGGGACCTTCAAGGACAGG	19
	GGTTGGTGTAGTAGGCGTTGTG	22
TaSOD	CTGGAAGAACCTCAAGCCTATTA	23
	ATCCTTGTAAAGCAGCACCCT	21
TaCAT	GCCCAAGTGCTCCCACCACAACA	23
	TGAGGGTGCGGGAGGGGATG	20
